# Supplementary material
Source: publisher figshare collection journal article supplement (https://sage.figshare.com/ndownloader/files/23425745)
Supplement: Supplementary file 1 [file 23425745]

**Appendix:**

**The Semi-structured interview guide included the following open-ended questions and the subjects were encouraged to elaborate on each of these:**

Introduction:

- Demographic details.
- What is your reason for attending the clinic today?

Knowledge about illness and medication:

- Are you aware of a name for your illness?
- What do you understand about this illness/how does it affect you?
- How many people in your circle are aware of your diagnosis/illness/problems?
- What medications are you on/ what do you know about the benefits/side effects of

these medications/effects of medications on the foetus?

- What do your family members think about the medications you are on?

Decision making about pregnancy:

- Are you pregnant/planning pregnancy? if pregnant, was this a planned pregnancy?
- What do your family members think about you getting pregnant?
- Is there any gender preference for the baby?
- What steps have you taken /any steps to prepare yourself for motherhood?
- What are your concerns about pregnancy or your future role as a mother?
- What are your thoughts on how your illness may affect your child/ during pregnancy and/or after?
- What do you think about taking psychotropic mediations during pregnancy and while breastfeeding?

Attitude towards doctors and medical advice:

- What have the doctors told you about your illness and medications?
- What advice were you given in the clinic today regarding your pregnancy and psychiatric condition?
- What do you think about medical advice?
- How do you plan to follow it?
